# Supplementary material
Source: PubMed Central journal article supplement (PMC9708097)
Supplement: NIHMS1846766-supplement-1.pdf [file NIHMS1846766-supplement-1.pdf]

**Table S1.** Mutation rate estimates for hgRNAs in the MARC1 mice. Related to **Figures 4 and 5.**

| hgRNA identifier | Mutation rate (muts / day) |                      |                       |                |
|------------------|----------------------------|----------------------|-----------------------|----------------|
|                  | Posterior mean estimate    | Lower bound (90% CI) | Higher bound (90% CI) | Naïve estimate |
| AAGCCGCGCG       | 5.08E-02                   | 3.60E-02             | 9.28E-02              | 6.69E-02       |
| ACATTCGGTT       | 6.31E-04                   | 6.31E-04             | 8.90E-04              | 1.96E-03       |
| ACCACTGCTG       | 6.31E-04                   | 6.31E-04             | 8.90E-04              | 9.81E-03       |
| ACCCTGGGAC       | 6.31E-04                   | 6.31E-04             | 8.90E-04              | 2.85E-03       |
| ACTCCATGTT       | 6.31E-04                   | 6.31E-04             | 1.06E-03              | 5.32E-03       |
| AGCACACCCA       | 1.01E-01                   | 7.17E-02             | 1.31E-01              | 1.49E-01       |
| AGGTGTTCAA       | 4.28E-02                   | 3.03E-02             | 6.58E-02              | 5.46E-02       |
| AGTCTGCCTC       | 6.31E-04                   | 6.31E-04             | 1.06E-03              | 4.81E-03       |
| ATGACCCACC       | 6.31E-04                   | 6.31E-04             | 1.06E-03              | 6.92E-04       |
| ATGCTTAGCT       | 1.08E-02                   | 7.65E-03             | 1.40E-02              | 1.62E-02       |
| ATGGAGGGAC       | 4.01E-01                   | 2.84E-01             | 6.16E-01              | 1.88E+00       |
| ATGGCGCCTA       | 6.31E-04                   | 6.31E-04             | 8.90E-04              | 6.19E-03       |
| ATGTCATCGA       | 2.01E-01                   | 2.01E-01             | 3.68E-01              | 9.67E-01       |
| CAAGGGCCCT       | 1.20E-01                   | 8.52E-02             | 1.56E-01              | 1.57E-01       |
| CACAACGCCC       | 4.76E-01                   | 2.84E-01             | 5.19E-01              | 2.11E+00       |
| CACCTCGGAC       | 2.15E-02                   | 1.81E-02             | 3.31E-02              | 8.05E-02       |
| CACTCTCAAG       | 4.76E-01                   | 4.01E-01             | 7.32E-01              | 2.77E+00       |
| CATATATTCC       | 2.01E-01                   | 1.70E-01             | 3.10E-01              | 7.64E-01       |
| CATCGTCGTC       | 6.31E-04                   | 6.31E-04             | 8.90E-04              | 1.02E-03       |
| CATTGGAGGT       | 1.70E-01                   | 1.43E-01             | 3.10E-01              | 6.34E-01       |
| CCACCATCCG       | 1.08E-02                   | 9.09E-03             | 1.66E-02              | 2.42E-02       |
| CCCAAACAC        | 1.01E-01                   | 8.52E-02             | 1.56E-01              | 1.43E-01       |
| CCGTACTTCA       | 1.70E-01                   | 1.43E-01             | 2.61E-01              | 4.36E-01       |
| CCTTTACCGC       | 6.31E-04                   | 6.31E-04             | 8.90E-04              | 2.65E-03       |
| CGAATCCTTT       | 6.31E-04                   | 6.31E-04             | 1.06E-03              | 4.99E-03       |
| CGACAGTTAT       | 6.31E-04                   | 6.31E-04             | 1.06E-03              | 6.47E-03       |
| CGGGGGTTCC       | 8.52E-02                   | 6.04E-02             | 1.10E-01              | 2.74E-01       |
| CGGTCTGTAC       | 1.63E-03                   | 1.37E-03             | 2.50E-03              | 5.70E-03       |
| CGTAGGGCCC       | 2.15E-02                   | 1.81E-02             | 3.31E-02              | 5.78E-02       |
| CGTGTTGTCT       | 9.70E-04                   | 9.70E-04             | 1.77E-03              | 5.62E-03       |
| CTACTCGGCC       | 1.20E-01                   | 8.52E-02             | 1.56E-01              | 1.40E-01       |
| CTCGTAAGTC       | 4.76E-01                   | 2.84E-01             | 5.19E-01              | 2.17E+00       |
| CTGAGTTTTA       | 1.63E-03                   | 1.63E-03             | 2.97E-03              | 1.05E-01       |
| CTGCTATCGA       | 7.17E-02                   | 7.17E-02             | 1.31E-01              | 2.24E-01       |
| CTTTTGTCGG       | 6.31E-04                   | 6.31E-04             | 1.06E-03              | 2.47E-03       |

|            |          |          |          |          |
|------------|----------|----------|----------|----------|
| GAAGACCCGC | 1.52E-02 | 1.28E-02 | 2.78E-02 | 2.92E-02 |
| GACACAGACA | 1.20E-01 | 1.20E-01 | 2.19E-01 | 2.57E-01 |
| GACCCTTCCT | 4.28E-02 | 3.60E-02 | 6.58E-02 | 1.40E-01 |
| GACGAAGACA | 3.03E-02 | 2.55E-02 | 4.66E-02 | 4.39E-02 |
| GATACCCCA  | 1.20E-01 | 1.20E-01 | 2.19E-01 | 5.68E-01 |
| GCCAACGAGC | 6.31E-04 | 6.31E-04 | 8.90E-04 | 2.42E-03 |
| GCCAAGATGG | 6.31E-04 | 6.31E-04 | 1.06E-03 | 3.72E-03 |
| GCCCAGATAC | 6.88E-04 | 6.88E-04 | 1.26E-03 | 9.27E-04 |
| GCGTCGCCCT | 3.03E-02 | 3.03E-02 | 5.54E-02 | 5.01E-02 |
| GCTCTACGCC | 6.31E-04 | 6.31E-04 | 1.06E-03 | 4.67E-03 |
| GGCCCCTACA | 6.31E-04 | 6.31E-04 | 8.90E-04 | 1.20E-03 |
| GGCGACCGCA | 5.42E-03 | 5.42E-03 | 9.91E-03 | 1.13E-02 |
| GGGTGACACG | 6.31E-04 | 6.31E-04 | 8.90E-04 | 9.73E-03 |
| GTACACAATT | 1.43E-01 | 1.43E-01 | 2.61E-01 | 5.32E-01 |
| GTCAAATACC | 1.63E-03 | 9.70E-04 | 1.77E-03 | 8.02E-03 |
| GTGGAGCCTC | 1.13E+00 | 6.72E-01 | 1.23E+00 | 3.01E+00 |
| TAACTTATAC | 6.31E-04 | 6.31E-04 | 1.06E-03 | 1.53E-03 |
| TACACAGATA | 8.52E-02 | 6.04E-02 | 1.10E-01 | 2.29E-01 |
| TACACCCAC  | 4.28E-02 | 4.28E-02 | 7.82E-02 | 6.30E-02 |
| TAGAACCATG | 3.60E-02 | 3.03E-02 | 5.54E-02 | 5.35E-02 |
| TAGCCATGCA | 1.37E-03 | 9.70E-04 | 1.77E-03 | 5.63E-03 |
| TCATCAGGCC | 2.39E-01 | 2.01E-01 | 3.68E-01 | 1.31E+00 |
| TCTATCGAGG | 6.31E-04 | 6.31E-04 | 8.90E-04 | 1.28E-02 |
| TCTTATAACC | 7.17E-02 | 5.08E-02 | 9.28E-02 | 1.13E-01 |
| TGGTGATGGT | 6.72E-01 | 4.76E-01 | 8.70E-01 | 2.67E+00 |
| TTAGCTATGT | 9.48E-01 | 6.72E-01 | 1.23E+00 | 2.82E+00 |
| TTATCGTTCA | 6.31E-04 | 6.31E-04 | 8.90E-04 | 1.70E-03 |
| TTGAGCATAA | 1.13E+00 | 4.01E-01 | 1.73E+00 | 2.86E+00 |
| TTGTGACATA | 1.63E-03 | 1.63E-03 | 2.97E-03 | 8.73E-03 |

**Table S2.** hgRNA identifier, spacer sequences and mutation rate estimates in the iPSC line. hgRNA #22 was not targeted by amplification primers. Related to **Figure 7**.

| hgRNA # | Identifier | Spacer                | Mutation rate estimates (mut / day) |
|---------|------------|-----------------------|-------------------------------------|
| 1       | AAACCCATGA | GGTTTAGTATGGAGGGAAGTG | 0.059413881                         |
| 2       | AACATGCTAG | GGTTTTCGATCATAGGTCGTG | 0.006335047                         |
| 3       | AATAATGCCG | GGTGCCCTTTATGGGACCGTG | 0.000591681                         |
| 4       | AATCCATCAC | GGTGACAAACGTATGTCAGTG | 0.019481606                         |

|    |             |                        |              |
|----|-------------|------------------------|--------------|
| 5  | AATTGGGCAA  | GGTTGTGGGGAAGCTCGGTGTG | -1.55303E-11 |
| 6  | AGACAGCAAC  | GGTGTCTTTGCTCGAGGGTG   | 0.00032599   |
| 7  | ATACCACACT  | GGTTGTAAGCGATGGTTTGTG  | -1.55303E-11 |
| 8  | ATCTAACCGA  | GGTGTGCGGAGATTATGCGTG  | -1.55303E-11 |
| 9  | ATGACCGTCG  | GGTCCTAGAAGCTGAGTTGTG  | 0.120838624  |
| 10 | CAACGAGATT  | GGTGCTAGCGGTTTCGAAGTG  | 0.029447842  |
| 11 | CATTCACAAA  | GGTGGCAATTTCGATCTGAGTG | 0.008819366  |
| 12 | CCCCGCCGCC  | GGTAGAATGGATCCACGGGTG  | 0.008408573  |
| 13 | CCCTCGCACC  | GGTTCAACCGGCGTCTTTGTG  | 0.135938928  |
| 14 | CCGTTAACAC  | GGTTGGCTTTACTCCTTTGTG  | 0.019492236  |
| 15 | CGGCGGGTTG  | GGTCGTCGTTTCGTAGGGCGTG | 0.023817137  |
| 16 | CGTTCATCAA  | GGTGAGAACAGAACGTTTTGG  | 0.04235805   |
| 17 | GAATCAGCCG  | GGTTTTAGTAAATGGTGAGTG  | 0.020988445  |
| 18 | GAATTA AAAA | GGTGCTAATAGTTAGCTCGTG  | 0.008158287  |
| 19 | GACAACCTCC  | GGTAATCTAAAGATCCCCGTG  | -1.55303E-11 |
| 20 | GACTATGTAA  | GGTACTAGTTACTTACGGGTG  | -1.55303E-11 |
| 21 | GAGTCAAGCG  | GGTTATCGTTACGGATTTGTG  | 0.039817255  |
| 22 | GCCAAAAGCT  | GGTGGTCGCCGTGGAGAGGTG  | NA           |
| 23 | GGCAACTACG  | GGTGGCAGCCAGCCACTTGTG  | 0.00571604   |
| 24 | GTAATATATA  | GGTGAGCATGATAACGTCGTG  | 0.059595844  |
| 25 | GTGGGCGAGA  | GGTGAGATGCCTCAAGTGGTG  | 0.217232375  |
| 26 | TAAACCCAAT  | GGTTTACTTAGTTAACTAGTG  | 0.008963861  |
| 27 | TAATTAATCC  | GGTTGAGATAATCAAAAAGTG  | 0.029885995  |
| 28 | TCAACCCTCT  | GGTGACGCGAGGACGGTGGTG  | 0.024973171  |
| 29 | TCAGCAAAAA  | GGTG (truncated)       | 0.001174739  |
| 30 | TGCACTTCCT  | GGTTCCCGTTAGCTCGTAGTG  | 0.048665863  |
| 31 | TGTCCAGATT  | GGTCTTCCTGGAATCTACGTG  | 0.068354208  |
| 32 | TTCTTCTCCC  | GGTCGCGAAAATGTGCCGGTG  | 0.011352671  |

**Table S3.** Oligonucleotides used in this study. Related to **Figure 7**.

| Oligonucleotide                                    | Sequence                 | Source                      |
|----------------------------------------------------|--------------------------|-----------------------------|
| AAVS1 guide RNA                                    | CACCGGGGCCACTAGGGACAGGAT | Eldred et al. <sup>45</sup> |
| AAVS1 right homology arm genotyping reverse primer | GGAACGGGGCTCAGTCTGA      | Eldred et al. <sup>45</sup> |
| ACTB qPCR forward primer                           | GCGAGAAGATGACCCAGATC     | Wahlin et al. <sup>46</sup> |
| ACTB qPCR reverse primer                           | CCAGTGGTACGGCCAGAGG      | Wahlin et al. <sup>46</sup> |
| Cas9 genotyping forward primer                     | CACCTTGTACTCGTCGGTGA     | Eldred et al. <sup>45</sup> |

|                                        |                                                              |                                |
|----------------------------------------|--------------------------------------------------------------|--------------------------------|
| Cas9 qPCR forward primer               | CCGAAGAGGTCGTGAAGAAG                                         | González et al. <sup>47</sup>  |
| Cas9 qPCR reverse primer               | GCCTTATCCAGTTCGCTCAG                                         | González et al. <sup>47</sup>  |
| CREBBP qPCR forward primer             | GAGAGCAAGCAAACGGAGAG                                         | Wahlin et al. <sup>46</sup>    |
| CREBBP qPCR reverse primer             | AAGGGAGGCCAAACAGGACA                                         | Wahlin et al. <sup>46</sup>    |
| GAPDH qPCR forward primer              | TAGCCAAATTCGTTGTCATACC                                       | Maruotti et al. <sup>48</sup>  |
| GAPDH qPCR reverse primer              | CTGACTTCAACAGCGACACC                                         | Maruotti et al. <sup>48</sup>  |
| hgRNA PCR1 forward primer              | ACACTCTTTCCCTACACGACGCTCTTCCGATC<br>TATGGACTATCATATGCTTACCGT | Leeper et al. <sup>30</sup>    |
| hgRNA PCR1 reverse primer              | TGACTGGAGTTCAGACGTGTGCTCTTCCGATC<br>TGCCATACCAATGGGCCCGAA    | Leeper et al. <sup>30</sup>    |
| hgRNA PCR1 truncated forward primer    | CTACACTCTTTCCCTACACGAC                                       | Leeper et al. <sup>30</sup>    |
| hgRNA PCR1 truncated reverse primer    | GTGACTGGAGTTCAGACGTG                                         | Leeper et al. <sup>30</sup>    |
| hgRNA pre-amplification forward primer | AAGTAATAATTTCTTGGGTAGTTTGCAG                                 | Leeper et al. <sup>30</sup>    |
| hgRNA pre-amplification reverse primer | GAAAAAGCCATACCAATGGGC                                        | Leeper et al. <sup>30</sup>    |
| hgRNA qPCR forward primer              | ATGGACTATCATATGCTTACCGT                                      | Kalhor et al. <sup>29</sup>    |
| hgRNA qPCR reverse primer              | TTCAAGTTGATAACGGACTAGC                                       | Kalhor et al. <sup>29</sup>    |
| rtTA genotyping forward primer         | GCTGATTATGATCCTGCAAGC                                        | Eldred et al. <sup>45</sup>    |
| rtTA qPCR forward primer               | GCTAAAGTGCATCTCGGCAC                                         | This paper                     |
| rtTA qPCR reverse primer               | TGTTCCCTCCAATACGCAGCC                                        | This paper                     |
| Sox11 qPCR forward primer              | TGATGTTTCGACCTGAGCTTG                                        | Remeseiro et al. <sup>49</sup> |
| Sox11 qPCR reverse primer              | TAGTCGGGGAACCTCGAAGTG                                        | Remeseiro et al. <sup>49</sup> |
