# Supplementary material
Source: PubMed Central journal article supplement (PMC9708097)

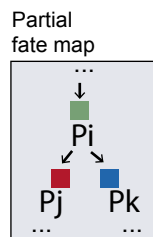

### Step 1: generate count graph (forward propagation)

Count nodes: T D N L DD

### Step 2: generate sample size (backward propagation)

Count nodes: T D N L DD

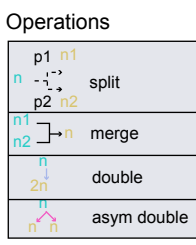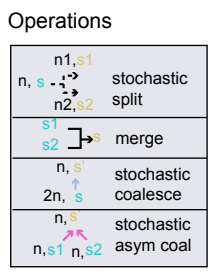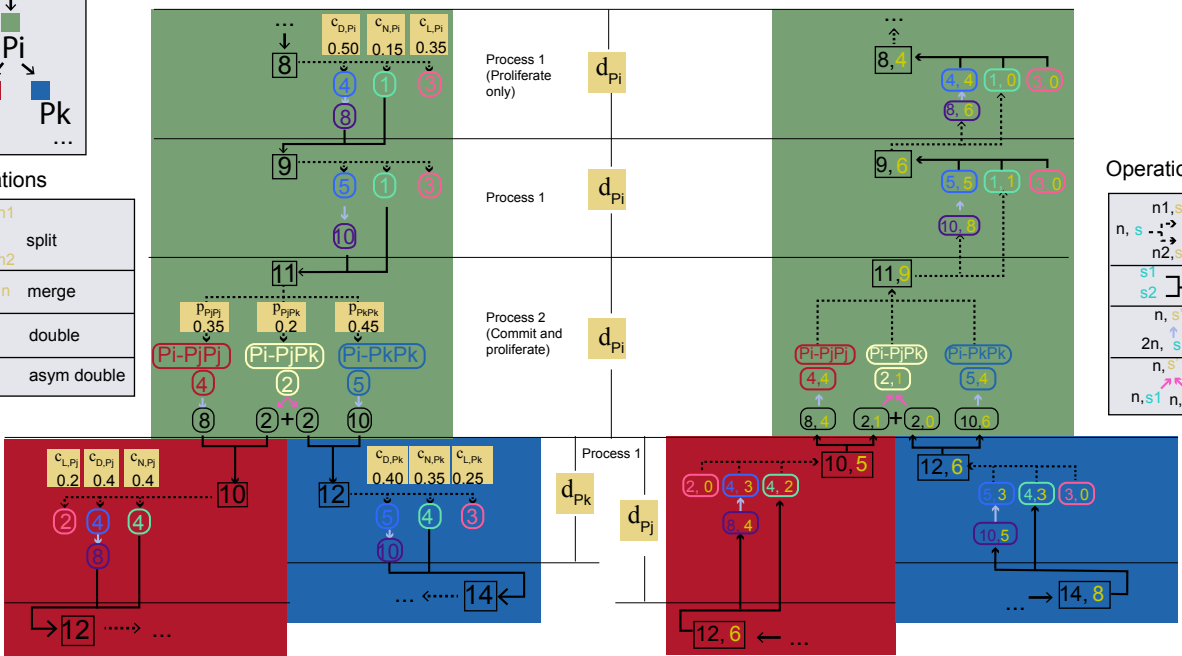

### Step 3a: reorganize count graph

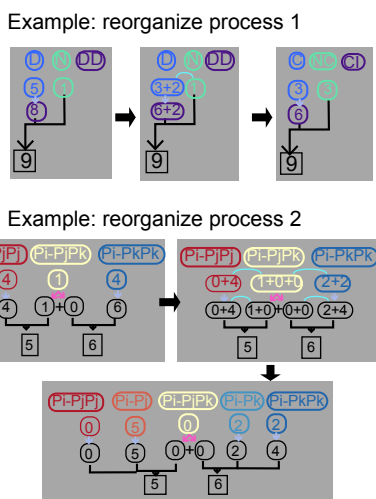

Count nodes: T C NC CI

### Step 3b: list tree nodes

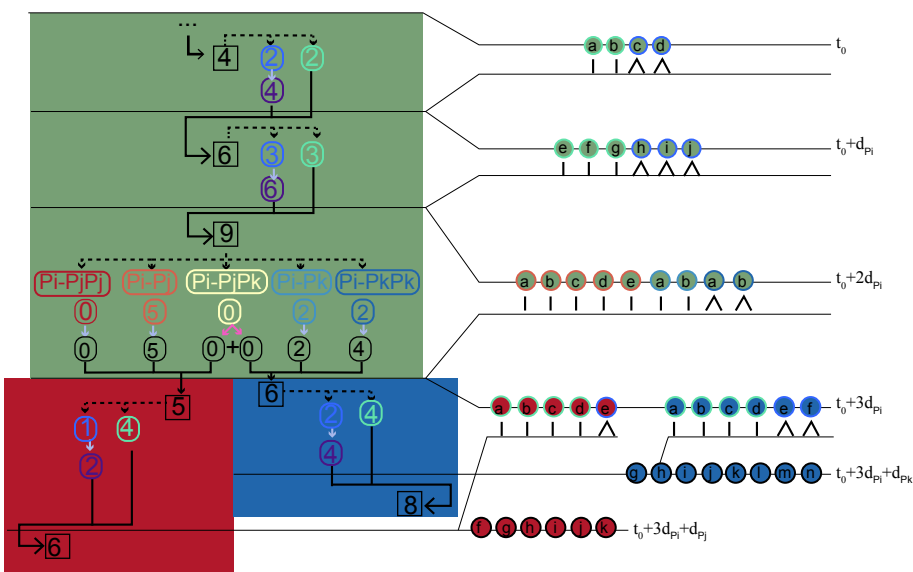

### Step 4a: connect tree nodes

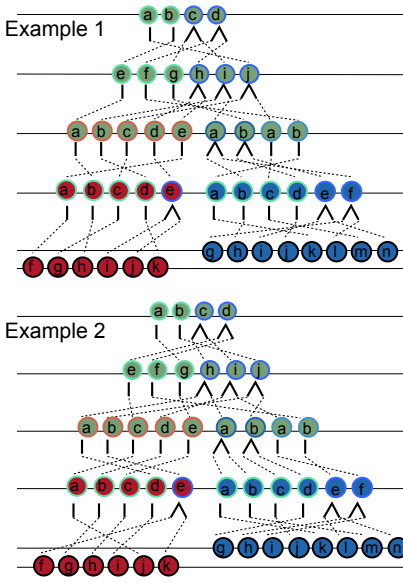

### Step 4b: simplify phylogeny

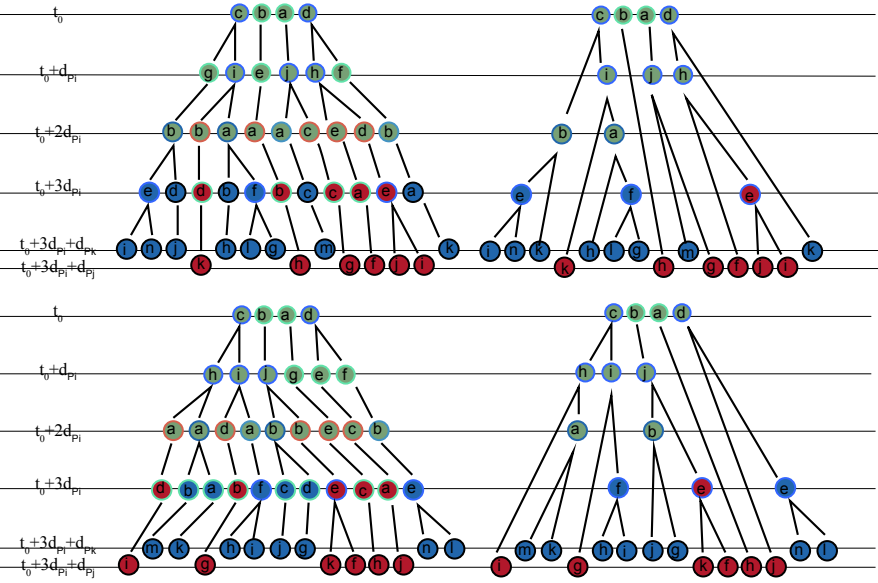

Supplement: NIHMS1846766-supplement-3.pdf [file NIHMS1846766-supplement-3.pdf]
