# Supplementary material
Source: PubMed Central journal article supplement (PMC9708097)
Supplement: NIHMS1846766-supplement-5.pdf [file NIHMS1846766-supplement-5.pdf]

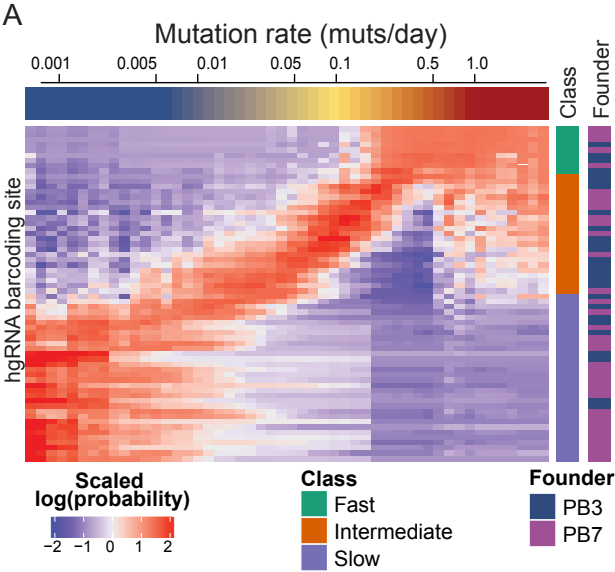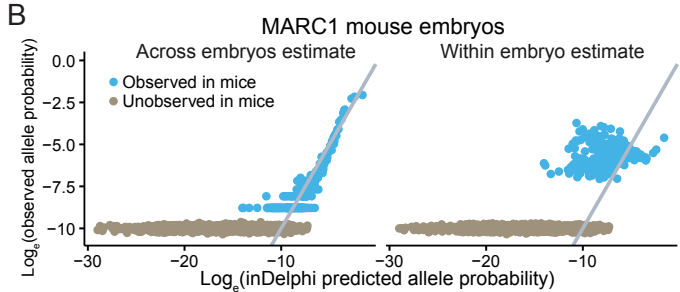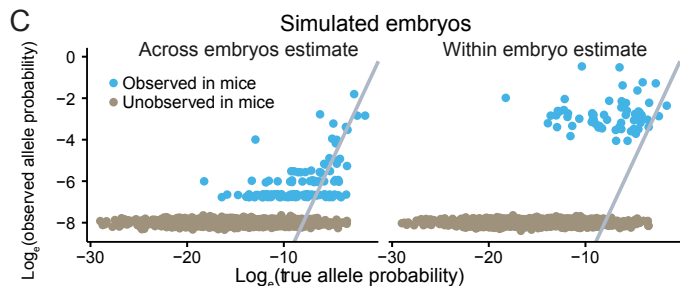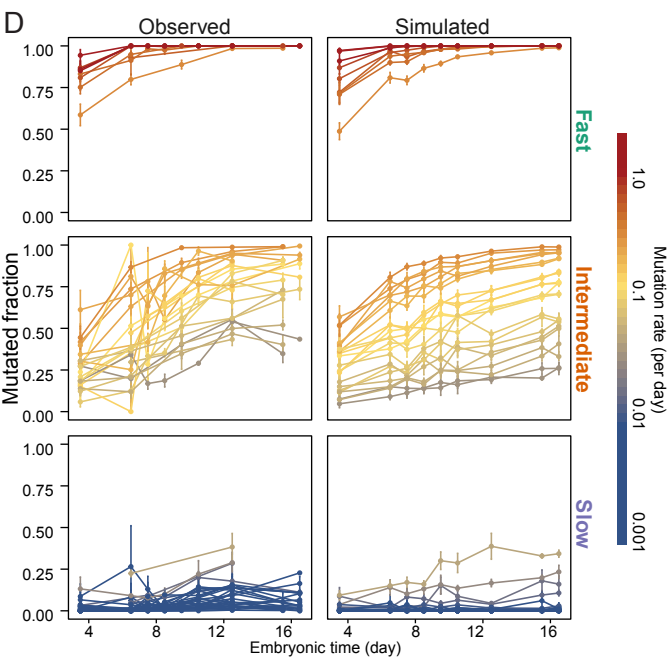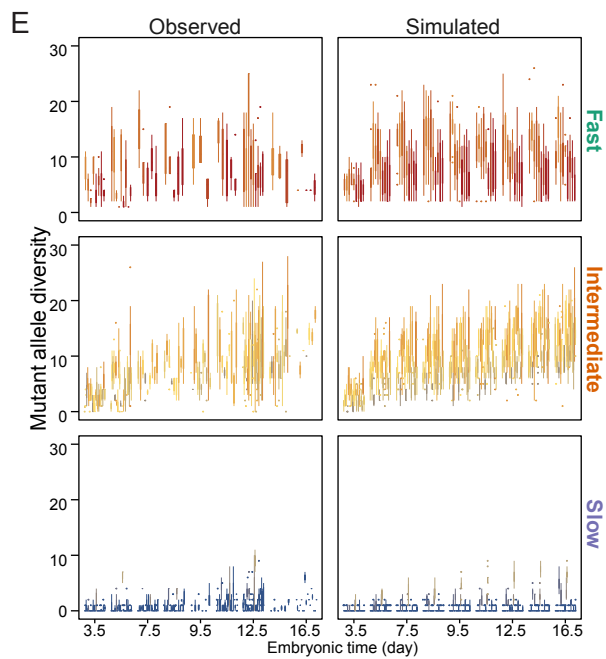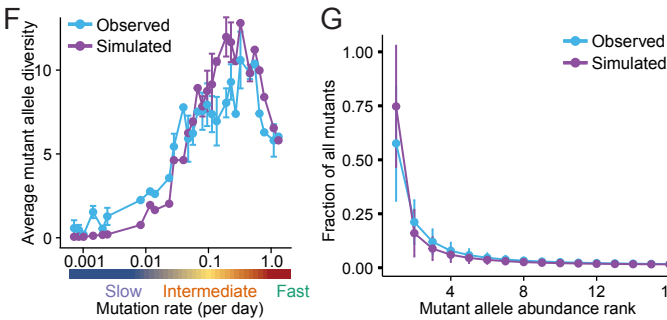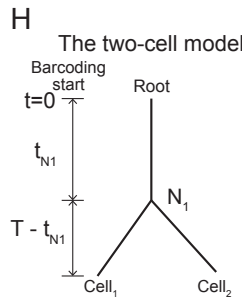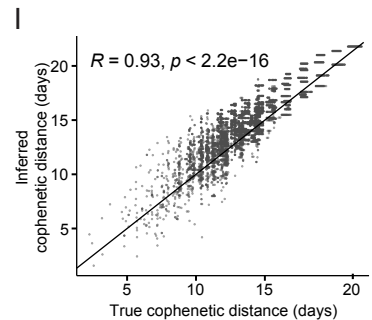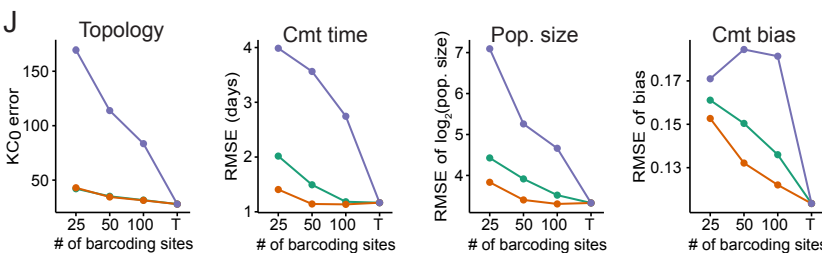

| Site type    | Mutation rate                   |                                  |
|--------------|---------------------------------|----------------------------------|
|              | Mean<br>(per site per division) | Range<br>(per site per division) |
| Fast         | 0.28                            | 0.14 – 0.3                       |
| Intermediate | 0.05                            | 0.014 – 0.14                     |
| Slow         | 0.002                           | 0.0002 – 0.014                   |

T: True phylogeny
