# Supplementary material
Source: PubMed Central journal article supplement (PMC9708097)

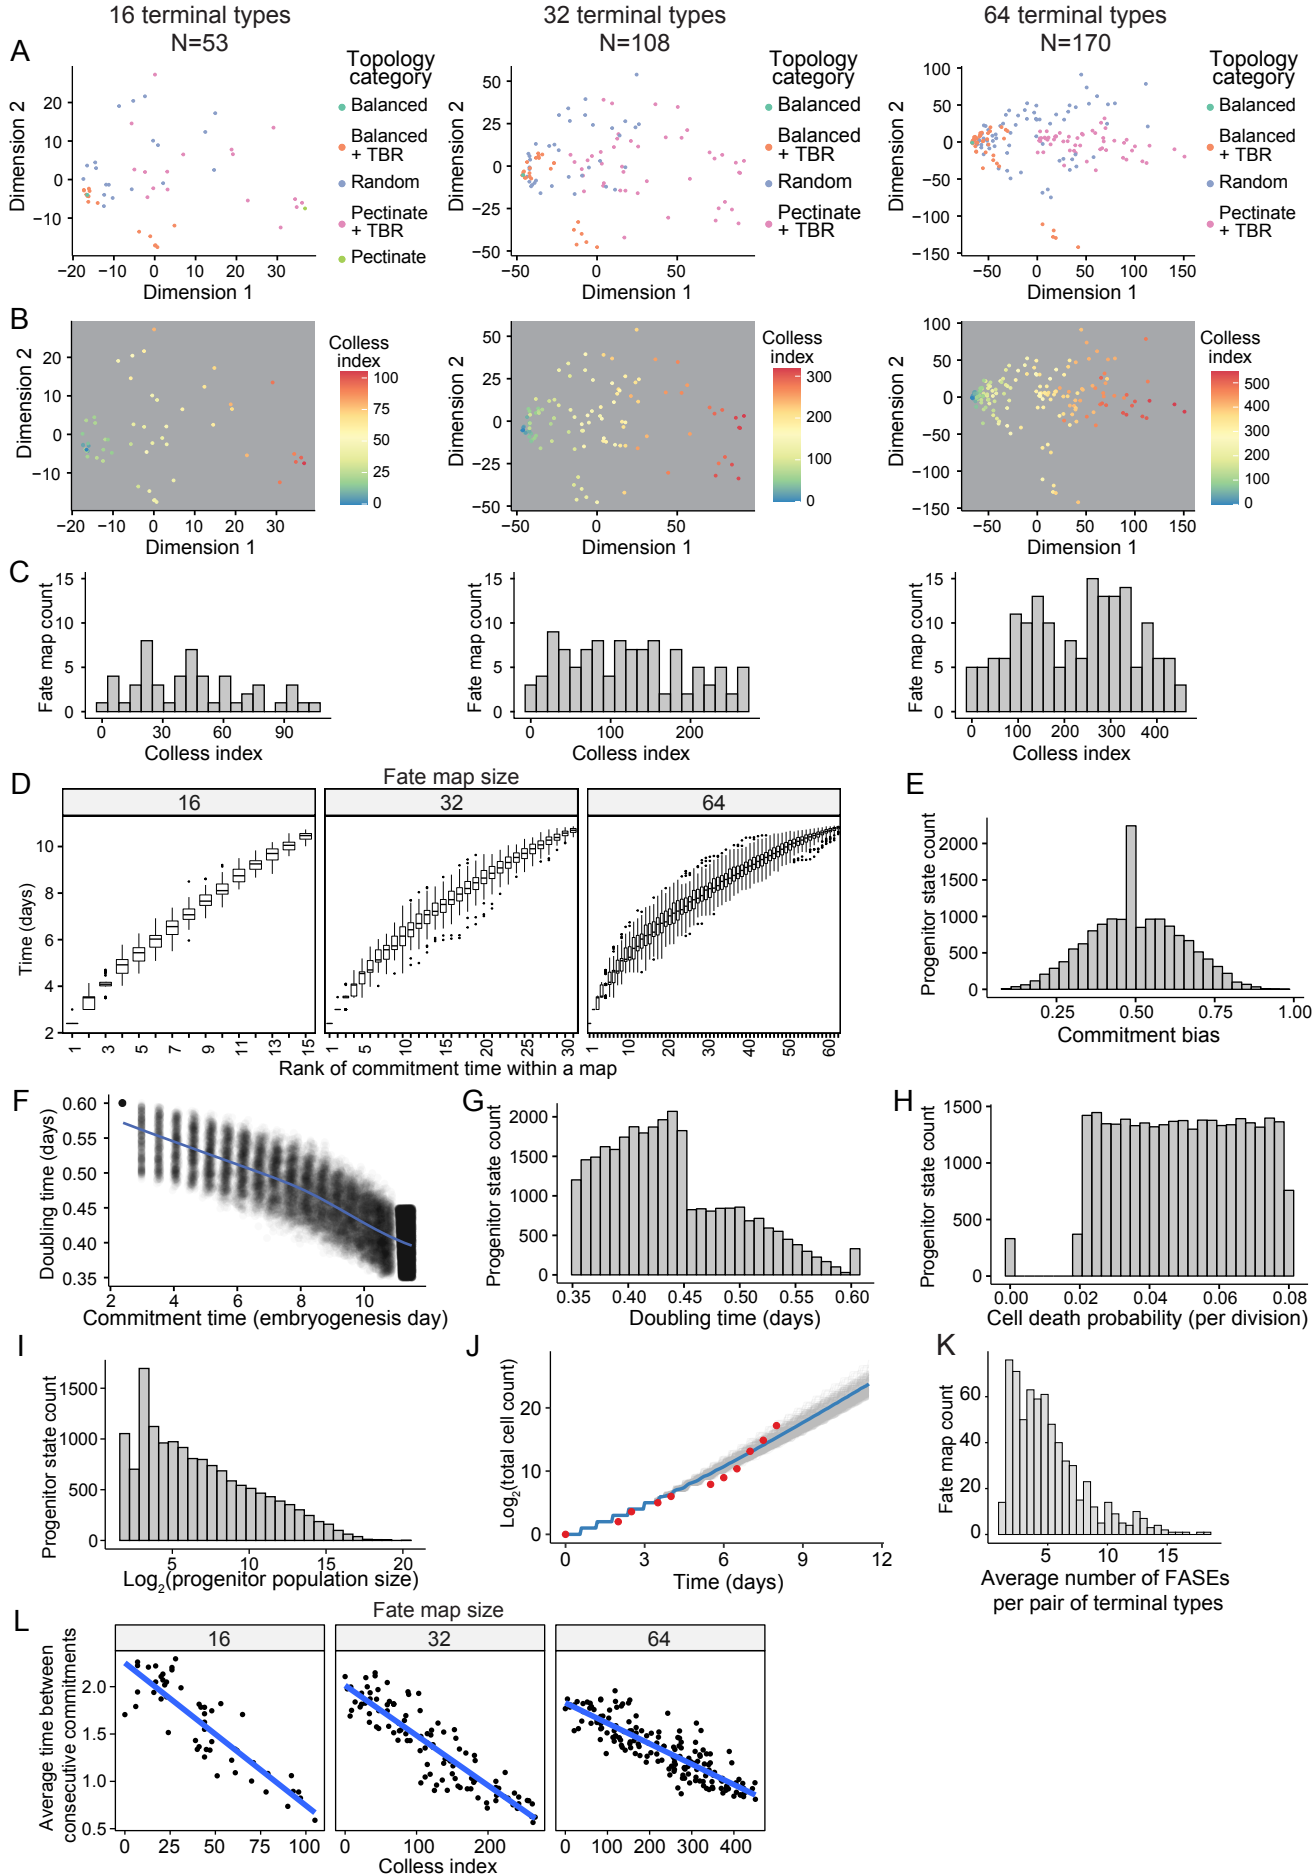

Supplement: NIHMS1846766-supplement-2.pdf [file NIHMS1846766-supplement-2.pdf]

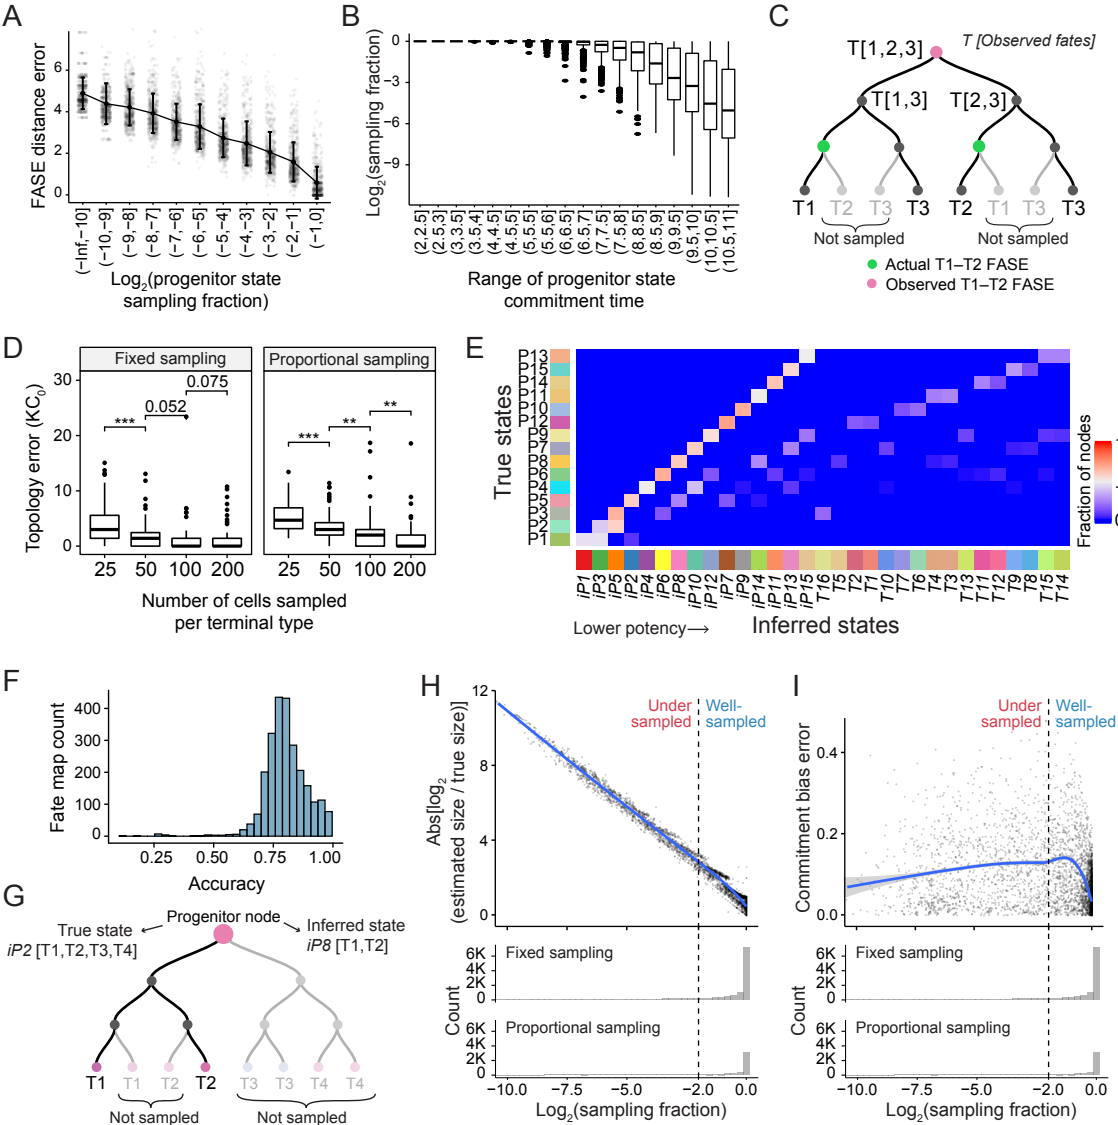

Supplement: NIHMS1846766-supplement-4.pdf [file NIHMS1846766-supplement-4.pdf]

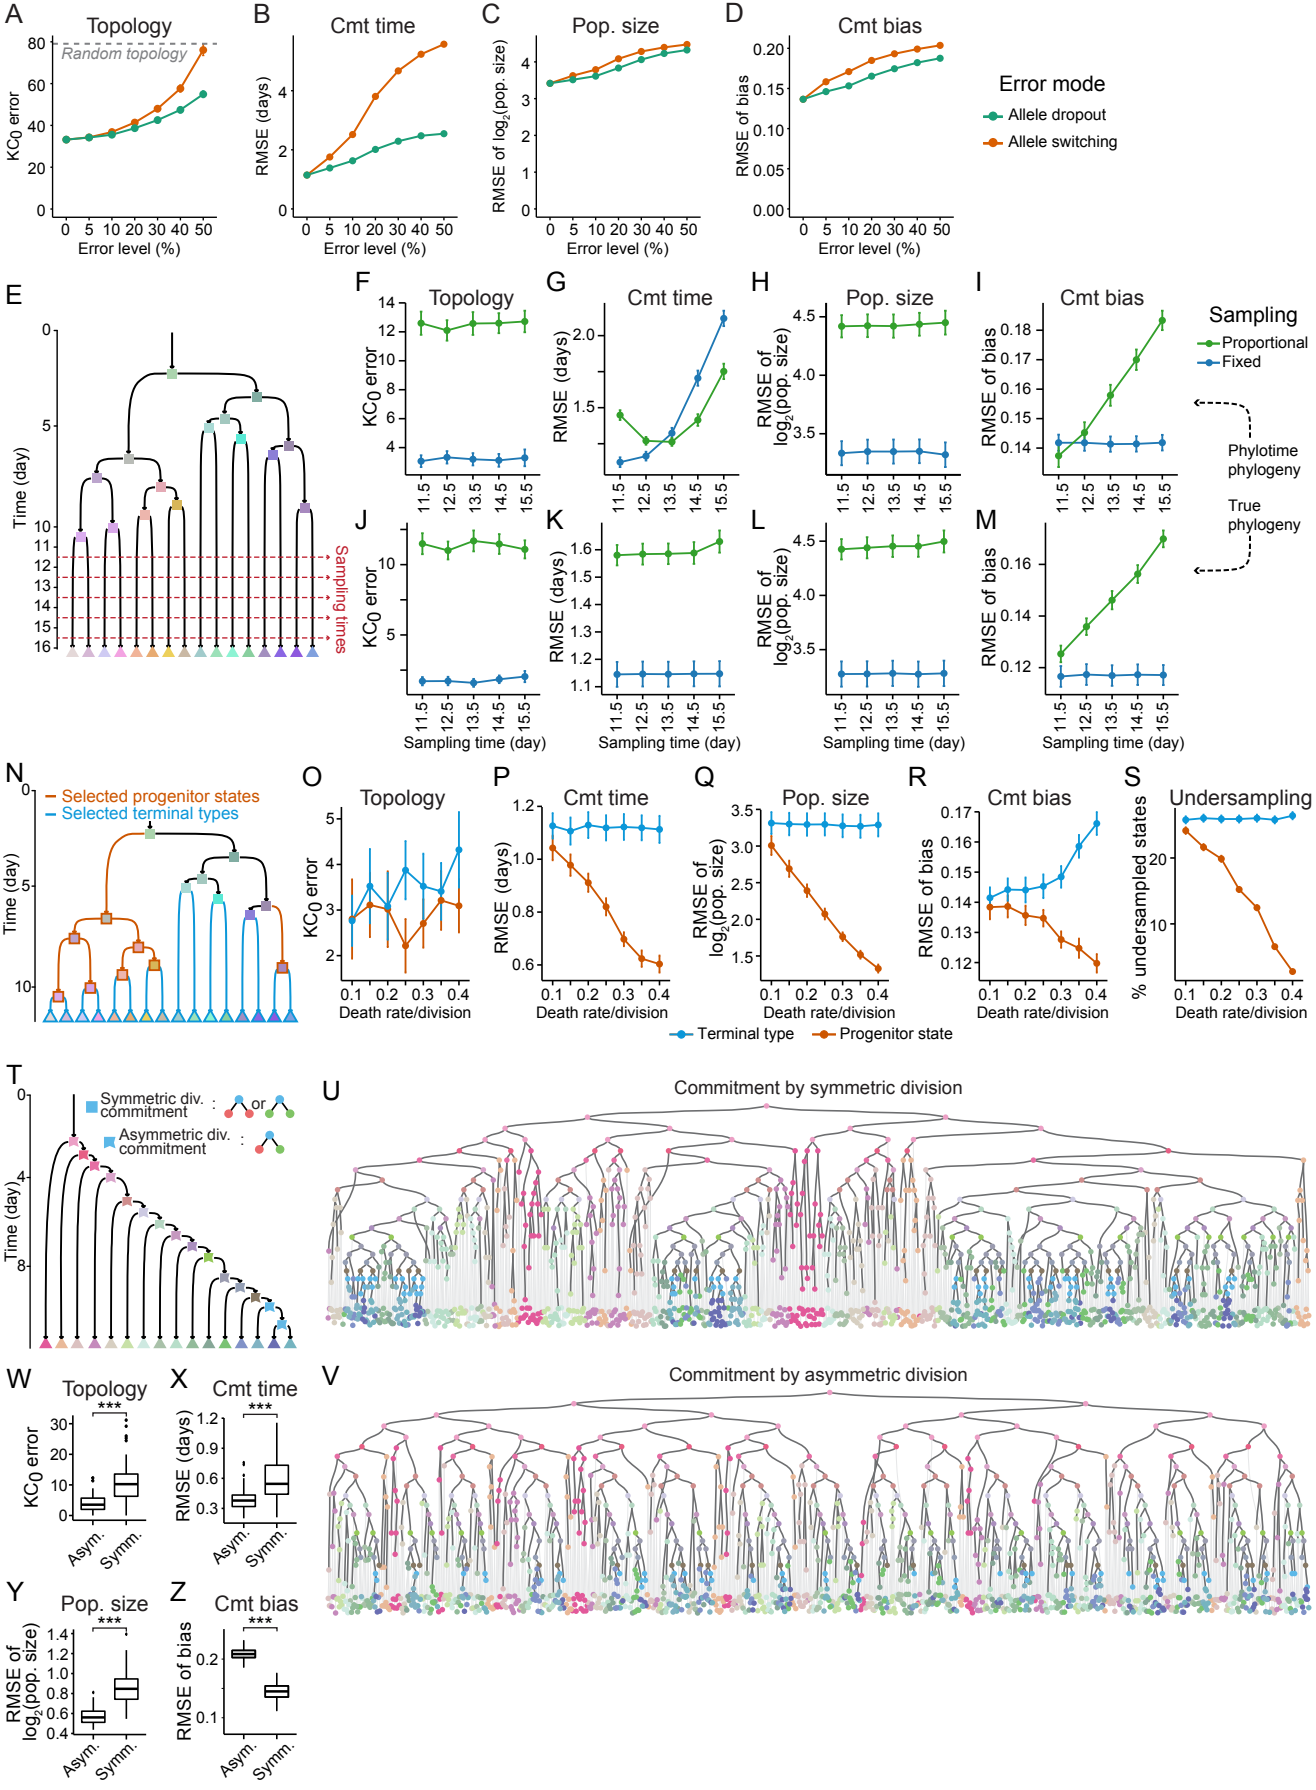

Supplement: NIHMS1846766-supplement-6.pdf [file NIHMS1846766-supplement-6.pdf]

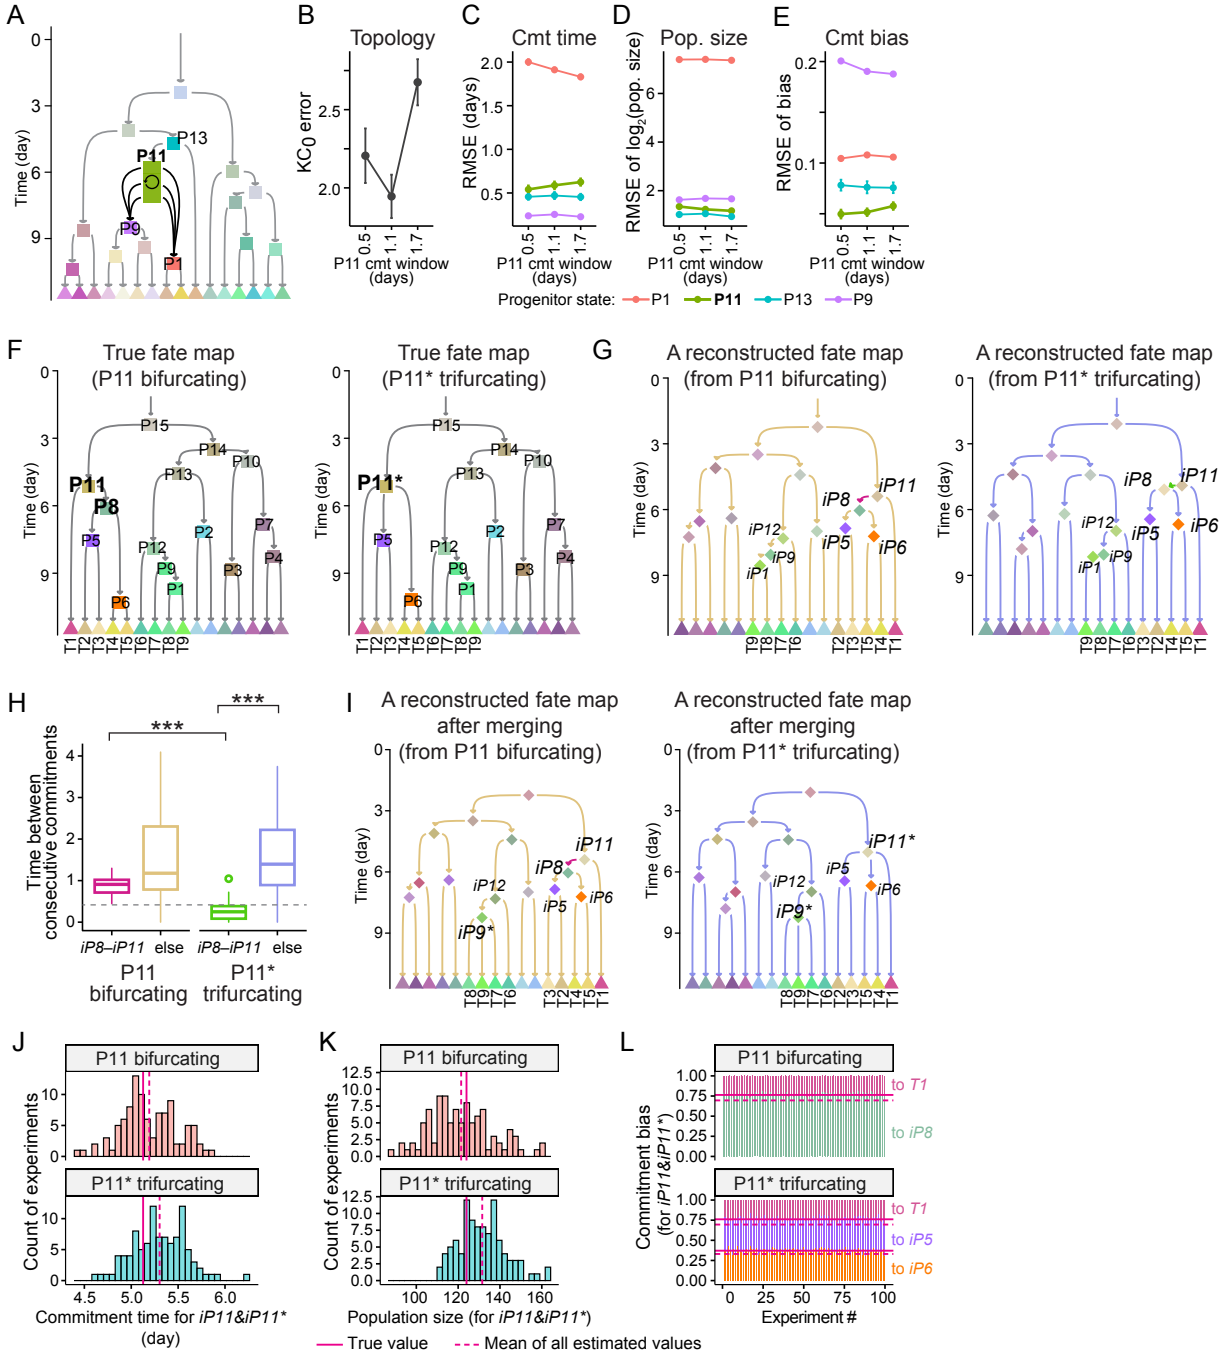

Supplement: NIHMS1846766-supplement-7.pdf [file NIHMS1846766-supplement-7.pdf]

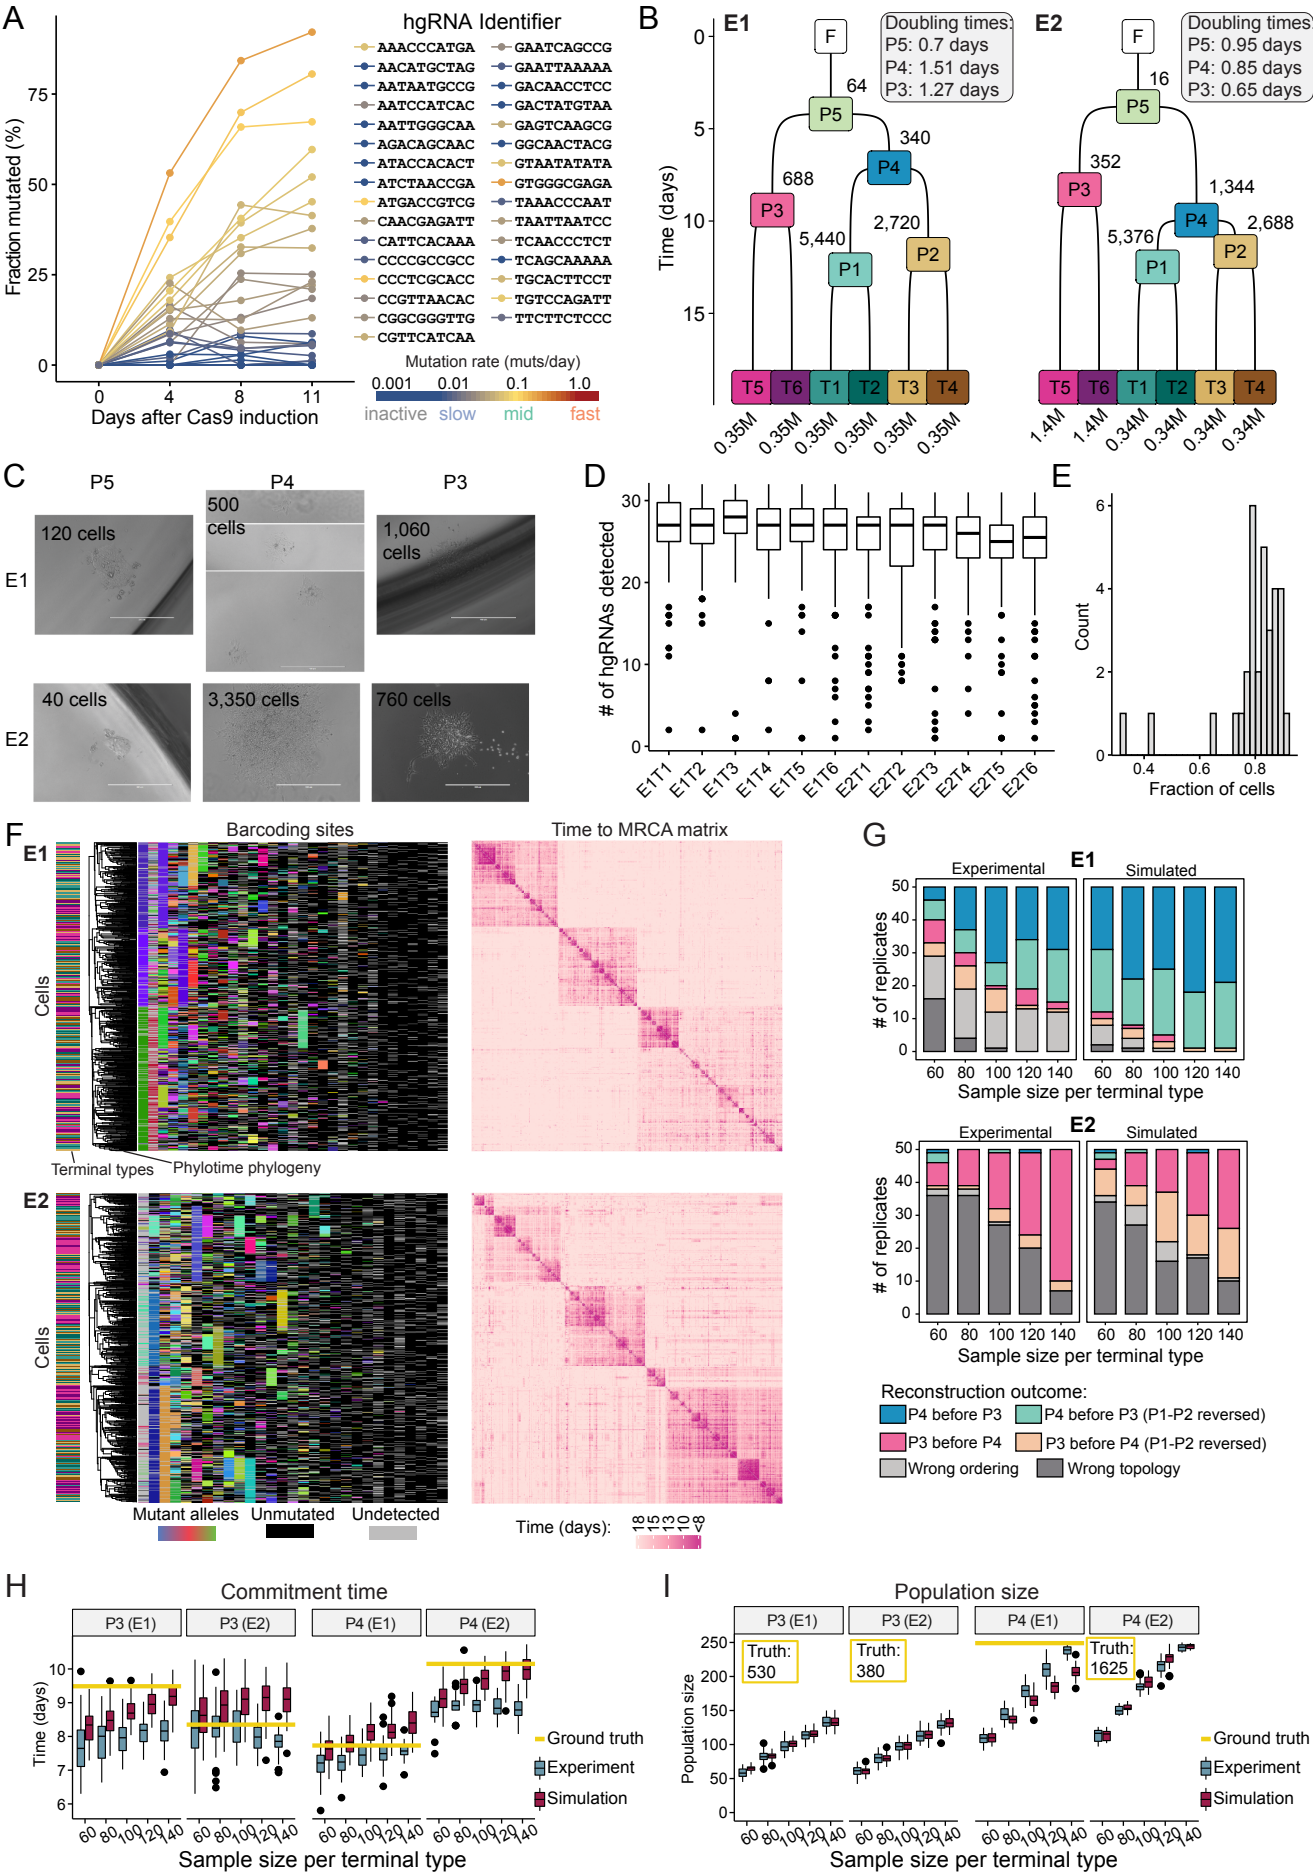

Supplement: NIHMS1846766-supplement-8.pdf [file NIHMS1846766-supplement-8.pdf]

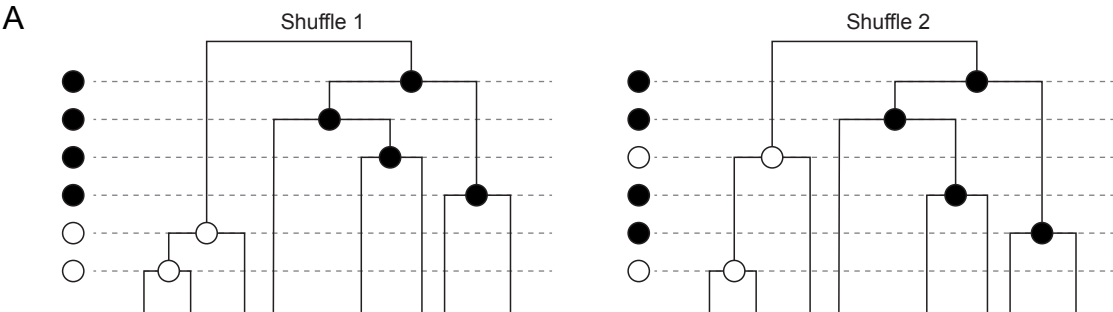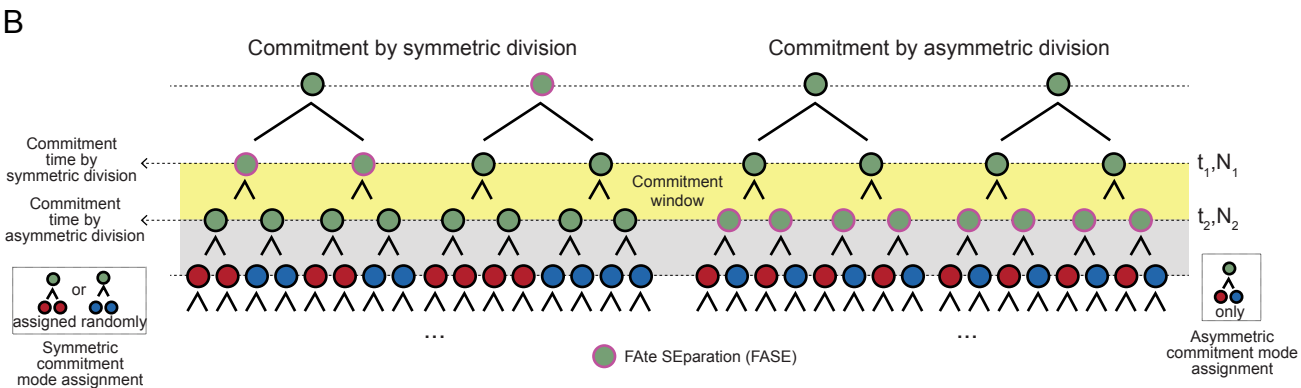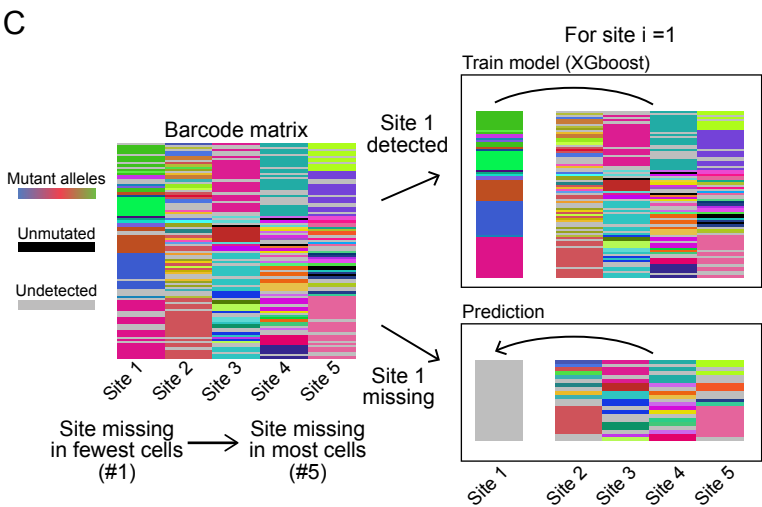

Supplement: NIHMS1846766-supplement-9.pdf [file NIHMS1846766-supplement-9.pdf]
